# Supplementary material for: Coupling to short linear motifs creates versatile PME-1 activities in PP2A holoenzyme demethylation and inhibition
Source: eLife journal article supplement (doi:10.7554/elife.79736), 2022-08-04
Supplement: supp [file Figure 1c.xlsx]

## Sheet: Figure1c
	AC	ACB'γ1	ACB'γ1-PME-1		Dunnett's multiple comparisons test	Mean Diff.	95.00% CI of diff.	Significant?	Summary	Adjusted P Value	B-?
	0.148025	0.231791	0.187673		ACB'γ1 vs. AC	0.09085	0.06348 to 0.1182	Yes	***	0.0002	A	AC
	0.167383	0.259705	0.189351		ACB'γ1 vs. ACB'γ1-PME-1	0.06601	0.03865 to 0.09338	Yes	***	0.0008	C	ACB'γ1-PME-1
	0.162065	0.258522	0.174953
					Test details	Mean 1	Mean 2	Mean Diff.	SE of diff.	n1	n2	q	DF
					ACB'γ1 vs. AC	0.25	0.1592	0.09085	0.009559	3	3	9.504	6
					ACB'γ1 vs. ACB'γ1-PME-1	0.25	0.184	0.06601	0.009559	3	3	6.906	6
