# Supplementary material for: Coupling to short linear motifs creates versatile PME-1 activities in PP2A holoenzyme demethylation and inhibition
Source: eLife journal article supplement (doi:10.7554/elife.79736), 2022-08-04
Supplement: supp [file Figure 2e.xlsx]

## Sheet: Figure 2e
					Inhibition of SYT16 binding to PP2A-B56γ1 holoenzyme
				Concentration of PME-1	PME-1 FL			PME-1 IL			PME-1 N18
				0 μM	1	1	1	1	1	1	1	1	1
				20 μM	0.801887	0.801802	0.814815	0.943299	0.948598	0.954545	0.966851	0.971564	0.942029
				40 μM	0.556604	0.576577	0.550926	0.907216	0.915888	0.969697	1.19337	0.92891	0.898551
				60 μM	0.179717	0.158108	0.181019	0.881443	0.939252	1.0404	1.1768	0.914692	0.884058
					Inhibition of CRTC3 binding to PP2A-B56α holoenzyme
				Concentration of PME-1	PME-1 FL			PME-1 IL			PME-1 N18
				0 μM	1	1	1	1	1	1	1	1	1
				20 μM	0.629412	0.655469	0.668595	0.875556	0.830508	0.773438	1.03226	1.01681	0.982906
				40 μM	0.457143	0.314063	0.329752	0.768889	0.645763	0.5625	1.14223	0.983193	0.991453
				60 μM	0.168067	0.228906	0.164463	0.462222	0.44322	0.484375	1.08065	0.923529	0.965812
					Inhibition of Cdc6 binding to PP2A-PR70 holoenzyme
				Concentration of PME-1	PME-1 FL			PME-1 IL			PME-1 N18
				0 μM	1	1	1	1	1	1	1	1	1
				20 μM	0.842857	0.733594	0.80991	0.954887	0.908257	0.771186	1.11927	0.907563	0.984252
				40 μM	0.487143	0.392188	0.476577	0.819549	0.726606	0.694915	1.29358	1	0.937008
				60 μM	0.2	0.228906	0.215315	0.693233	0.544037	0.576271	1.16514	1.00756	0.968504
