# Supplementary material for: Coupling to short linear motifs creates versatile PME-1 activities in PP2A holoenzyme demethylation and inhibition
Source: eLife journal article supplement (doi:10.7554/elife.79736), 2022-08-04
Supplement: supp [file Figure 5a.xlsx]

## Sheet: Figure 5a
				Demethylation of AC-B'γ1
			Demethylation time (min)	PME-1 WT			PME-1 3MU
			0	0.0771508	0.067026	0.121134	0.0564377	0.101602	0.100164
			5	0.671399	0.497307	0.572642	0.0754044	0.242524	0.164542
			10	0.759643	0.688043	0.641368	0.172387	0.308026	0.328312
			15	0.880265	0.758894	0.897276	0.273333	0.421694	0.419763
			20	1	1	1	1	1	1
				Demethylation of AC dimer
			Demethylation time (min)	PME-1 WT			PME-1 3MU
			0	0.0880044	0.0610326	0.145992	0.0126497	0.0958089	0.1496
			5	0.401504	0.490066	0.574473	0.409414	0.491999	0.551
			10	0.786164	0.657703	0.690289	0.615939	0.668354	0.764617
			15	0.911427	0.77319	0.942844	0.857741	0.885494	0.951809
			20	1	1	1	1	1	1
				Demethylation of AC-Bα
			Demethylation time (min)	PME-1 WT			PME-1 3MU
			0	0.108165	0.0688485	0.0692779	0.0716076	0.0893688	0.0960723
			5	0.44331	0.487572	0.507536	0.442983	0.611857	0.515781
			10	0.842041	0.814795	0.6572	0.685871	0.776867	0.780533
			15	0.970757	0.900087	0.90684	0.820784	0.841481	0.861426
			20	1	1	1	1	1	1
				Demethylation of AC-PR70
			Demethylation time (min)	PME-1 WT			PME-1 3MU
			0	0.125985	0.0256783	0.109746	0.0633195	0.0351833	0.111904
			5	0.515665	0.49192	0.640542	0.430829	0.457755	0.518036
			10	0.787711	0.740449	0.715111	0.811715	0.735885	0.686706
			15	0.829548	0.907885	0.889552	0.847297	0.867644	0.898365
			20	1	1	1	1	1	1
