# Supplementary material for: Coupling to short linear motifs creates versatile PME-1 activities in PP2A holoenzyme demethylation and inhibition
Source: eLife journal article supplement (doi:10.7554/elife.79736), 2022-08-04
Supplement: supp [file Figure 6b.xlsx]

## Sheet: Figure 6b
				Demethylated PP2Ac			p53 pT55				Ordinary one-way ANOVA of Demethylated PP2Ac
			Control	1	1	1	1	1	1		Dunnett's multiple comparisons test	Mean Diff.	95.00% CI of diff.	Significant?	Summary	Adjusted P Value	B-?
			PME-1 WT	3.75461	3.31268	3.62158	1.40538	1.42877	1.50111		PME-1 WT vs. Control	2.563	1.743 to 3.383	Yes	****	<0.0001	A	Control
			PME-1 + ABL127	2.49203	1.52463	1.88711	1.26635	1.05709	1.06957		PME-1 WT vs. PME-1 + ABL127	1.595	0.7751 to 2.415	Yes	***	0.0008	C	PME-1 + ABL127
			PME-1 3MU	2.78478	1.95241	2.3972	1.09897	0.96602	0.928283		PME-1 WT vs. PME-1 3MU	1.185	0.3649 to 2.005	Yes	**	0.0063	D	PME-1 3MU
			PME-1 ∆ IL	2.61509	1.93153	2.01085	0.614707	0.737336	0.854227		PME-1 WT vs. PME-1 ∆ IL	1.377	0.5572 to 2.197	Yes	**	0.0023	E	PME-1 ∆ IL
											Ordinary one-way ANOVA of p53_pT55
											Dunnett's multiple comparisons test	Mean Diff.	95.00% CI of diff.	Significant?	Summary	Adjusted P Value	B-?
											PME-1 WT vs. Control	0.4451	0.2376 to 0.6526	Yes	***	0.0004	A	Control
											PME-1 WT vs. PME-1 + ABL127	0.3141	0.1066 to 0.5216	Yes	**	0.0047	C	PME-1 + ABL127
											PME-1 WT vs. PME-1 3MU	0.4473	0.2398 to 0.6548	Yes	***	0.0003	D	PME-1 3MU
											PME-1 WT vs. PME-1 ∆ IL	0.7097	0.5022 to 0.9172	Yes	****	<0.0001	E	PME-1 ∆ IL
