# Supplementary material for: Coupling to short linear motifs creates versatile PME-1 activities in PP2A holoenzyme demethylation and inhibition
Source: eLife journal article supplement (doi:10.7554/elife.79736), 2022-08-04
Supplement: supp [file Figure 6d.xlsx]

## Sheet: Figure 6d
				control				ABL127
				0H	6H	12H	24H	0H	6H	12H	24H
			Normalized pT55	1	1.61217	2.30529	3.47383	0.342162	1.40604	1.46535	2.82691
				1	1.97754	2.8816	2.98526	0.900699	1.38728	1.47123	2.34446
				1	2.08479	3.84509	4.79258	0.693519	1.55319	1.85614	3.38376
			Normalized p53 total	1	1.20905	1.56876	3.15356	0.837868	1.44949	2.456	5.63184
				1	1.65114	3.38075	4.67796	1.71177	2.51678	3.65235	6.99831
				1	1.60595	3.7552	4.85676	1.33669	2.49574	3.22984	6.53733
				control				ABL127
				0H	6H	12H	24H	0H	6H	12H	24H
			pT55 % of changes	0	24.7457	52.7641	100	-26.5919	16.4135	18.8111	73.8496
				0	49.24	94.7784	100	-5.00193	19.5079	23.7366	67.722
				0	28.6029	75.0172	100	-8.08106	14.5862	22.5741	62.8532
			p53 total % of changes	0	9.70718	26.4104	100	-7.52856	20.8721	67.6091	215.079
				0	17.7038	64.7301	100	19.3522	41.2396	72.1147	163.088
				0	15.7115	71.4384	100	8.72982	38.7824	57.8165	143.575
