# Supplementary material for: Coupling to short linear motifs creates versatile PME-1 activities in PP2A holoenzyme demethylation and inhibition
Source: eLife journal article supplement (doi:10.7554/elife.79736), 2022-08-04
Supplement: supp [file Figure 6f.xlsx]

## Sheet: Figure 6f
				PME-1 WT				PME-1 3MU
				0H	6H	12H	24H	0H	6H	12H	24H
			Normalized pT55	1	2.96939	3.63472	4.37033	0.916783	3.67649	3.88804	3.36911
				1	2.53215	2.72192	3.25718	0.703204	1.82037	2.30857	2.89921
				1	2.60991	3.17077	3.88	0.902431	2.53175	2.8233	2.84774
			Normalized p53 total	1	2.14302	2.71017	4.3462	1.05889	2.96598	3.58711	9.13605
				1	2.24201	2.94427	5.09079	1.28193	2.50296	3.70218	6.9602
				1	2.38552	4.11722	6.57863	1.3878	3.40397	4.86106	10.2442
				PME-1 WT				PME-1 3MU
				0H	6H	12H	24H	0H	6H	12H	24H
			pT55 % of changes	0	58.4331	78.174	100	-2.46911	79.4132	85.6901	70.2932
				0	67.8788	76.2865	100	-13.149	36.3449	57.9736	84.1407
				0	55.8995	75.3738	100	-3.38783	53.1856	63.3089	64.1576
			p53 total % of changes	0	34.1588	51.1077	100	1.75978	58.7525	77.3149	243.143
				0	30.3612	47.5279	100	6.89172	36.74	66.0552	145.698
				0	24.8362	55.8778	100	6.95152	43.0924	69.2115	165.707
