# Supplementary material for: Coupling to short linear motifs creates versatile PME-1 activities in PP2A holoenzyme demethylation and inhibition
Source: eLife journal article supplement (doi:10.7554/elife.79736), 2022-08-04
Supplement: supp [file Figure 6g.xlsx]

## Sheet: Figure 6g
				Control			ABL127
			0 h	1	1	1	0.408372	0.526181	0.518834
			6 h	1.33342	1.19768	1.29816	0.970023	0.551214	0.622337
			12 h	1.4695	0.852355	1.02394	0.596642	0.402818	0.574685
			24 h	1.10156	0.638154	0.986786	0.501952	0.335004	0.517606
				PME-1 WT			PME-1 3MU
			0 h	1	1	1	0.8658	0.548553	0.65026
			6 h	1.38561	1.12941	1.09406	1.23955	0.727287	0.743763
			12 h	1.34114	0.924482	0.770124	1.08389	0.62357	0.580799
			24 h	1.00555	0.639818	0.589788	0.368771	0.416541	0.277986
